# Supplementary material
Source: ML conference proceedings conference paper supplement (https://proceedings.neurips.cc/paper_files/paper/2023/hash/5d087955ee13fe9a7402eedec879b9c3-Abstract.html)
Supplement: Supplementary file 1 [file 5d087955ee13fe9a7402eedec879b9c3-Supplemental-Conference.pdf]

## 481 **Supplementary Material**

482 We provide details omitted in the main paper.

- 483 • Appendix A: related work (cf. subsection 2.3 and section 5 of the main paper).
- 484 • Appendix B: additional benchmark details (cf. subsection 2.2 of the main paper).
- 485 • Appendix C: additional training details (cf. section 4 of the main paper).
- 486 • Appendix D: additional results and analyses (cf. section 4 of the main paper).
- 487 • Appendix E: additional discussions (cf. section 5 of the main paper).

488 *To keep the same reference numbers as in the main paper, we use plain text for those newly added*  
489 *references in the supplementary material.*

### 490 **A Related Work**

491 We review related work on other transfer learning paradigms. We briefly describe their settings and  
492 distinguish their differences from our proposed holistic transfer (HT) problem.

#### 493 **A.1 Domain Adaptation**

494 Domain adaptation (DA) is the most iconic machine learning setting to tackle the domain-shift  
495 problem (Liu et al., 2021; Chen et al., 2022; Shen et al., 2022; Rangwani et al., 2022; Gandelsman et  
496 al., 2022; Yang et al., 2023). With the common objective of transferring source-domain knowledge  
497 to target domains, various settings have been proposed to incorporate different constraints and  
498 assumptions. The assumption can be the degrees of overlap between the source and the target label  
499 sets (Busto et al., 2017; Cao et al., 2018; You et al., 2019; Saito et al., 2020; Yang et al., 2022; Jang  
500 et al., 2022). To relax the constraint of accessing source data, source-free DA can solely rely on  
501 the target data for adaptation (Ding et al., 2022; Kundu et al., 2022; Chhabra et al., 2023). Despite  
502 the abundant variations, DA settings all share one common assumption: the target distributions in  
503 training and testing are matched, making our HT fundamentally different from them. In our HT,  
504 we can encounter target test classes that are unseen in the target training set but seen in the source  
505 domain. Therefore, HT requires a distinct ability that can generalize the style shifts learned on the  
506 target seen classes to other unseen classes.

#### 507 **A.2 Out-of-domain Generalization**

508 Although fine-tuning a pre-trained model often leads to impressive accuracy for downstream tasks,  
509 recent studies have revealed that it may compromise the out-of-domain (OOD) robustness of the  
510 model [20, 2, 37, 21]. Several robust fine-tuning methods are thus proposed to balance the trade-off  
511 between in-domain downstream accuracy and OOD generalization (Raghunathan et al., 2020; Xie et  
512 al., 2020; Tian et al., 2023). LP-FT [21] proposed to learn a classifier with frozen features before  
513 end-to-end fine-tuning to avoid feature distortion. Some other approaches relied on ensembles with  
514 pre-trained models to increase the robustness (Wortsman et al., 2022; Ilharco et al., 2022). However,  
515 the main focus of these studies remains on preserving the robustness to different input styles for  
516 classes seen in the target training set. This is significantly different from HT. Our HT problem aims  
517 to generalize the styles for classes unseen in the target training set.

#### 518 **A.3 Continual Learning**

519 The goal of continual learning (CL) is to sequentially adapt to multiple tasks without catastrophically  
520 forgetting the previously learned ones [16, 26, 24]. To achieve this goal, existing studies have  
521 proposed to exploit a replay buffer for storing old data (Rebuffi et al., 2017; Chaudhry et al., 2019;  
522 Wu et al., 2022; Tiwari et al., 2022; Yoon et al., 2022; Luo et al., 2023; Zhu et al., 2023; Zhou et al.,  
523 2023), or to constrain the fine-tuning with old models (Yoon et al., 2017; Dhar et al., 2019; Ahn et al.,  
524 2019; Douillard et al., 2022; Wang et al., 2022). Unlike HT, CL still assumes all the encountered  
525 training distributions, which could be many, are aligned with their corresponding test distributions.  
526 Although reducing forgetting can be the first step for HT to maintain unseen class accuracy, we

Table 10: A summary of the dataset statistics for our HT benchmark.

| Datasets               | Source domains              | Target domain                   | #Classes | #Seen classes                   | #Target training                | #Target test                    |
|------------------------|-----------------------------|---------------------------------|----------|---------------------------------|---------------------------------|---------------------------------|
| Office-Home            | Art                         | Clipart<br>Product<br>Real      | 65       | 30                              | 1,471<br>1,265<br>1,413         | 1,330<br>1,361<br>1,335         |
|                        | Real                        | Art<br>Clipart<br>Product       | 65       | 30                              | 857<br>1,493<br>1,459           | 750<br>1,330<br>1,361           |
| FEMNIST                | 40 writers                  | 10 new writers                  | 62       | Vary by data<br>collection bias | Vary by data<br>collection bias | Vary by data<br>collection bias |
| iWildCam               | 53 camera trap<br>locations | 21 new camera trap<br>locations | 181      | Vary by data<br>collection bias | Vary by data<br>collection bias | Vary by data<br>collection bias |
| VTAB                   | CLIP                        | Caltech101                      | 102      | 51                              | 1,371                           | 6,084                           |
|                        |                             | CIFAR100                        | 100      | 50                              | 22,513                          | 10,000                          |
|                        |                             | DTD                             | 47       | 23                              | 920                             | 1,880                           |
|                        |                             | EuroSAT                         | 10       | 5                               | 8,424                           | 5,400                           |
|                        |                             | Flowers102                      | 102      | 51                              | 510                             | 6,149                           |
|                        |                             | Pets                            | 37       | 18                              | 1,445                           | 3,669                           |
|                        |                             | Resisc45                        | 45       | 22                              | 9,159                           | 6,300                           |
|                        |                             | SVHN                            | 10       | 5                               | 28,197                          | 26,032                          |
| SUN397                 | 397                         | 198                             | 37,542   | 21,750                          |                                 |                                 |
| iNaturalist<br>(Fungi) | CLIP                        | Fungi                           | 12       | 6                               | 30                              | 60                              |

527 argue that this is insufficient in HT due to the source-target domain mismatch. Adapting the features  
528 for unseen classes to the target domain remains a key challenge for HT. Moreover, HT can also be  
529 potentially compatible with CL to consider learning on a non-iid data stream.

#### 530 A.4 Zero-shot Learning

531 Zero-shot learning tackles the setting where training and test classes are completely disjoint (Xian et  
532 al., 2017; Chen et al., 2021; Xu et al., 2022; Pourpanah et al., 2022). As no training data are available  
533 for test classes, the main challenge resides in learning source features that can generalize to unseen  
534 semantic meanings. To achieve this, auxiliary information (e.g., texts or attributes) is usually needed  
535 to describe the test classes and connect them back to the training classes (Xu et al., 2020; Naeem et  
536 al., 2021; Chen et al., 2022; Li et al., 2022). In HT, we assume the missing classes in target domains  
537 are already seen in the source domain. We make this assumption to simplify the problem so that  
538 HT can focus on generalizing the domain shifts to unseen classes. However, we argue that HT is  
539 compatible with zero-shot learning to make the setting more flexible.

## 540 B Additional Benchmark Details

541 To support the study of the HT problem, we create a benchmark that covers extensive scenarios across  
542 both experimental and realistic public datasets. We provide details about these datasets.

### 543 B.1 Office-Home

544 **Setup.** We consider the standard domain adaptation setting but with some missing classes in the target  
545 training sets. We use the popular Office-Home dataset consisting of 65 categories from 4 domains  
546 (Art, Clipart, Real, and Product). In our benchmark, we use Art and Real as source domains; each  
547 source domain is then transferred to each of the three remaining target domains individually, resulting  
548 in six source-target pairs. For each source-target pair, we use all the data in the source domain to train  
549 a source model. Then, for each target domain, we randomly split the data of each class into training  
550 and test sets with a ratio of 7:3. We randomly sample 30 seen classes and combine the training data  
551 of these seen classes to create the target training set. Finally, the target test set consists of the test  
552 images of all 65 classes in the target domain. A summary of the statistics can be found in Table 10.

553 **Evaluation.** We follow the standard evaluation metric in the Office-Home dataset to compute the  
554 overall accuracy for each source-target pair. Besides, we explicitly compute the accuracy on the  
555 unseen-class data to evaluate the transferring performance of the unseen classes. The average accuracy  
556 over all the source-target pairs is also reported.

## 557 B.2 FEMNIST

558 **Setup.** The FEMNIST dataset contains 62-class hand-written characters from many writers with  
559 different writing styles. As we can only collect a limited-size data set for each writer, each writer’s  
560 data only cover a subset of the 62-class characters, resulting in the need for HT. We randomly sample  
561 40 writers whose data combined can cover all 62 classes and use their data to train a source model.  
562 Then, we randomly sample 10 new writers. Each new writer’s data is divided into training and test  
563 sets in a ratio of 7:3. Note that each client may not have enough images per class, which creates a  
564 realistic scenario of personalization with limited samples, which results in a mismatch of the class  
565 distributions between training and test sets. The dataset statistics are summarized in Table 10.

566 **Evaluation.** We report the overall accuracy averaged over all the 10 new writers. To evaluate the  
567 trade-off between seen and unseen classes, we also report the averaged accuracy on the seen and  
568 unseen classes, respectively. As this dataset has no oracle training set for each new writer, we report  
569 the seen accuracy computed by chopping out unseen classes in the classifier to evaluate the quality of  
570 the adapted features.

## 571 B.3 iWildCam

572 **Setup.** We consider a realistic scenario of HT, where we initially have abundant camera traps installed  
573 across many geo-locations (source domains) and now need to transfer to a new camera trap location  
574 (target domain). In the new location, we can only use the data collected within a fixed amount of time  
575 in the beginning (e.g., the first month) as our target training set. As it is impossible for all the animal  
576 species to appear in the first month, the target training data can bias toward some classes that show  
577 up. This is a natural data collection bias caused by time.

578 We start from the iWildCam dataset in the WILDS [17] benchmark. As we mainly focus on animal  
579 species classification, we remove the “empty” class for simplicity and thus obtain a total of 181  
580 classes. For each camera trap location, we sort the images by their timestamps and group images  
581 into sequences if the difference in their timestamps is smaller than 30 minutes, to avoid information  
582 leaks. We randomly sample 53 camera trap locations whose images cover all 181 classes and use all  
583 their data to train a source model. For each of the remaining locations, we randomly sample training  
584 and test sets based on a ratio of 7:3. We only keep locations with more than 500 images in both the  
585 training and test sets, thereby resulting in 21 new locations for adaptation. For each new location, we  
586 form the target training set by sorting the training images by time and only using the first 25% of  
587 them. A summary of the dataset statistics is given in Table 10.

588 **Evaluation.** We report the overall accuracy averaged over all 21 new locations. To evaluate the  
589 trade-off between seen and unseen classes, we also report the averaged accuracy on the seen and  
590 unseen classes, respectively. As this dataset has no oracle training set for each new location, we  
591 report the seen accuracy computed by chopping out unseen classes in the classifier to evaluate the  
592 quality of the adapted features.

## 593 B.4 VTAB

594 **Setup.** We consider another practical use of HT by going beyond domain adaptation and fine-tuning  
595 the zero-shot CLIP [30] for distribution shifts at the task levels. We use the VTAB [39] benchmark  
596 that includes various image classification tasks. To enable zero-shot predictions, we only use the  
597 tasks that provide text names for classes, thereby resulting in 9 tasks: Caltech101, CIFAR100, DTD,  
598 EuroSAT, Flowers102, Pets, Resisc45, SVHN, and SUN397. We use the standard training and test  
599 sets provided by the VTAB benchmark. Then, we randomly sample half of the classes as seen and  
600 the remaining as unseen. The target training set only includes the training images of the seen classes,  
601 while the target test set contains all the test images. A summary of the statistics of this dataset is  
602 shown in Table 10.

603 **Evaluation.** Following the standard evaluation in VTAB, we report the overall accuracy for each  
604 of the 9 tasks. Besides, we also compute the accuracy on the unseen-class data to evaluate the

605 transferring performance of unseen classes. Finally, the average accuracy across all 9 tasks is also  
606 reported.

## 607 **B.5 iNaturalist (2021 Version, Fungi)**

608 **Setup.** To demonstrate the impact of visually similar classes in HT, we carefully pick 6 pairs of fungi  
609 classes from the iNaturalist dataset, thus resulting in a total of 12 classes. Each pair of fungi classes  
610 corresponds to 2 species of visually similar fungi; one is non-toxic, while the other one is toxic. We  
611 use the zero-shot CLIP model with the fungi names as our source model. Then, the training images  
612 from the 6 non-toxic fungi classes form the target training set. The target test set consists of all the  
613 test images from all 12 classes. A summary of the dataset statistics and some examples are shown  
614 in Table 10.

615 **Evaluation.** We report the seen accuracy on the target test set to evaluate the adaptation performance.  
616 As wrongly predicting toxic fungi as non-toxic ones can result in severe outcomes, we also report the  
617 false negative rate, which is computed as the percentage of the images of toxic fungi being predicted  
618 as non-toxic fungi classes.

## 619 **C Additional Training Details**

620 We provide the training details for our results reported in section 4.

621 For the Office-Home dataset, we initialize a ResNet-50 with ImageNet pre-trained weights. Then,  
622 we train it on the source domain for 20 epochs using the SGD optimizer with a learning rate 1e-3,  
623 momentum 0.9, weight decay 5e-4, and batch size 64. For all methods that adapt to the target domains,  
624 we fine-tune the source model for 20 epochs using the SGD optimizer with a learning rate 1e-4,  
625 momentum 0.9, weight decay 5e-4, and batch size 64. For our suggested HT methods, we set the  
626 hyper-parameters  $\mathcal{L}_{\text{distill}} = 10$  and  $\mathcal{L}_{\text{rank}} = 100$ .

627 For the FEMNIST dataset, we train a LeNet from scratch on the data of the 40 source writers for 100  
628 epochs using the SGD optimizer with a learning rate 1e-2, momentum 0.9, weight decay 5e-4, and  
629 batch size 32. To adapt to each new writer, we fine-tune the source model for 10 epochs using the  
630 SGD optimizer with a learning rate 1e-3, momentum 0.9, weight decay 1e-4, and batch size 32. We  
631 set the hyper-parameters  $\mathcal{L}_{\text{distill}} = 0.1$  and  $\mathcal{L}_{\text{rank}} = 10$ .

632 For the iWildCam dataset, we train a ResNet-50, which is initialized with ImageNet pre-trained  
633 weights, on the data of source camera trap locations for 50 epochs using the SGD optimizer with a  
634 learning rate 3e-5, momentum 0.9, weight decay 0.0, and batch size 16. When adapting to each new  
635 location, we fine-tune the source model for 20 epochs using the SGD optimizer with a learning rate  
636 3e-6, momentum 0.9, weight decay 0.0, and batch size 16. We set the hyper-parameters  $\mathcal{L}_{\text{distill}} = 50$   
637 and  $\mathcal{L}_{\text{rank}} = 200$ .

638 For the VTAB benchmark, we use the class names for each of the 9 tasks to form the zero-shot CLIP  
639 models, which are ViT-B/32. We fine-tune the source model on target tasks for 20 epochs using the  
640 SGD optimizer with a learning rate 1e-5, momentum 0.9, weight decay 0.0, and batch size 64. We set  
641 the hyper-parameters  $\mathcal{L}_{\text{distill}} = 1$  and  $\mathcal{L}_{\text{rank}} = 5$ .

642 For the iNaturalist Fungi dataset, we use the fungi species names to build a zero-shot CLIP model  
643 with a ViT-B/32 architecture. We then fine-tune the source model on the target training set for 5  
644 epochs using the SGD optimizer with a learning rate 5e-5, momentum 0.9, weight decay 0.0, and  
645 batch size 5. We set the hyper-parameters  $\mathcal{L}_{\text{distill}} = 1$  and  $\mathcal{L}_{\text{rank}} = 1$ .

## 646 **D Additinal Results and Analyses**

### 647 **D.1 Variances of the Results in section 4**

648 We provide variances of our results reported in our main paper. We compute the variances across 3  
649 random seeds. Table 11 shows the variances of the test accuracy on Office-Home. The variances of  
650 the mean accuracy on FEMNIST and iWildCam are provided in Table 12 and in Table 13, respectively.  
651 Finally, Table 14 gives the variances of the test accuracy for each of the 9 tasks in VTAB. These  
652 results reveal that the reported accuracy is relatively robust across random seeds.

Table 11: Variances of domain adaptation 65-way test accuracy on Office-Home with 30 seen and 35 unseen classes (cf. Table 3). We compute the variances over 3 random seeds. **Blue**: HT methods suggested by us in section 3. **Red**: methods that significantly improve overall accuracy and successfully maintain unseen accuracy on the source model.  $\star$ : the linear classifier is frozen during training.

| Domains: source→target<br>Methods / Acc.                                      | Ar→Cl   |        | Ar→Pr   |        | Ar→Rw   |        | Rw→Ar   |        | Rw→Cl   |        | Rw→Pr   |        | Avg.    |        |
|-------------------------------------------------------------------------------|---------|--------|---------|--------|---------|--------|---------|--------|---------|--------|---------|--------|---------|--------|
|                                                                               | Overall | Unseen |
| Source                                                                        | 0.64    | 0.11   | 1.30    | 1.35   | 0.25    | 0.24   | 0.82    | 0.90   | 0.23    | 1.40   | 0.30    | 0.49   | 0.05    | 0.11   |
| Naive Target                                                                  | 0.02    | 0.01   | 0.14    | 0.02   | 0.27    | 0.53   | 0.93    | 1.19   | 0.00    | 0.36   | 0.35    | 1.11   | 0.04    | 0.09   |
| BN only                                                                       | 1.11    | 3.11   | 0.22    | 0.27   | 0.41    | 1.07   | 1.71    | 7.58   | 0.68    | 2.44   | 1.43    | 4.47   | 0.03    | 0.17   |
| BN (stats) only                                                               | 0.63    | 0.06   | 1.00    | 1.63   | 0.02    | 0.32   | 0.08    | 0.17   | 0.16    | 0.31   | 0.15    | 0.05   | 0.14    | 0.16   |
| BN (stats) only                                                               | 0.57    | 0.05   | 0.87    | 0.58   | 0.25    | 0.18   | 0.05    | 0.02   | 0.21    | 0.02   | 0.30    | 0.37   | 0.12    | 0.03   |
| LP-FT                                                                         | 0.14    | 0.14   | 0.05    | 0.04   | 0.08    | 0.18   | 0.16    | 0.61   | 0.01    | 0.31   | 0.35    | 0.87   | 0.02    | 0.04   |
| SGD (w/ frozen classifier) $\star$                                            | 0.02    | 0.52   | 0.63    | 1.27   | 0.75    | 0.98   | 0.07    | 0.31   | 0.57    | 0.85   | 0.09    | 0.60   | 0.07    | 0.18   |
| SGD + $\mathcal{L}_{\text{distill}}$ $\star$                                  | 0.28    | 0.09   | 0.03    | 0.01   | 0.70    | 0.73   | 0.23    | 0.94   | 0.05    | 0.09   | 0.15    | 1.02   | 0.02    | 0.01   |
| SGD + $\mathcal{L}_{\text{rank}}$ $\star$                                     | 1.02    | 0.78   | 0.39    | 0.48   | 0.88    | 1.13   | 0.01    | 0.51   | 0.07    | 0.67   | 0.09    | 0.03   | 0.08    | 0.05   |
| SWA $\star$                                                                   | 0.23    | 0.73   | 0.62    | 1.44   | 0.33    | 0.60   | 0.45    | 0.31   | 1.39    | 3.39   | 0.13    | 0.65   | 0.02    | 0.15   |
| SWAD $\star$                                                                  | 0.43    | 0.83   | 0.62    | 1.79   | 0.35    | 0.42   | 0.45    | 0.32   | 1.64    | 3.71   | 0.08    | 0.44   | 0.03    | 0.17   |
| LOLSGD $\star$                                                                | 0.36    | 0.20   | 0.62    | 1.00   | 0.20    | 1.25   | 0.73    | 0.61   | 1.20    | 1.59   | 0.17    | 0.65   | 0.00    | 0.11   |
| LOLSGD + $\mathcal{L}_{\text{rank}}$ $\star$                                  | 0.02    | 0.05   | 0.24    | 0.95   | 0.06    | 0.05   | 0.34    | 0.22   | 0.63    | 1.09   | 0.16    | 0.96   | 0.04    | 0.14   |
| LOLSGD + $\mathcal{L}_{\text{distill}}$ $\star$                               | 0.14    | 0.56   | 0.79    | 0.54   | 0.25    | 0.09   | 0.22    | 0.17   | 0.28    | 1.88   | 0.07    | 0.08   | 0.06    | 0.01   |
| LOLSGD + $\mathcal{L}_{\text{distill}}$ + $\mathcal{L}_{\text{rank}}$ $\star$ | 0.18    | 0.06   | 0.75    | 1.82   | 0.00    | 0.34   | 0.26    | 0.65   | 0.75    | 0.36   | 0.01    | 0.23   | 0.12    | 0.09   |
| Oracle                                                                        | 0.05    | 0.05   | 0.06    | 0.16   | 0.01    | 0.16   | 0.17    | 0.02   | 0.22    | 0.05   | 0.35    | 0.20   | 0.02    | 0.00   |

Table 12: Variances of FEMNIST mean accuracy of 10 new writers (cf. Table 5). We compute the variances over 3 random seeds.

| Methods                                              | Overall | Seen       | Seen | Unseen |
|------------------------------------------------------|---------|------------|------|--------|
|                                                      |         | (Chopping) |      |        |
| Source                                               | 0.44    | 0.12       | 0.07 | 5.12   |
| Naive Target                                         | 0.49    | 0.77       | 0.77 | 5.69   |
| SGD $\star$                                          | 0.43    | 0.17       | 0.11 | 1.90   |
| SGD + $\mathcal{L}_{\text{rank}}$ $\star$            | 0.55    | 0.08       | 0.04 | 4.05   |
| SGD + $\mathcal{L}_{\text{distill}}$ $\star$         | 0.37    | 0.19       | 0.13 | 1.72   |
| LOLSGD $\star$                                       | 0.48    | 0.10       | 0.17 | 4.73   |
| LOLSGD + $\mathcal{L}_{\text{rank}}$ $\star$         | 0.37    | 0.10       | 0.20 | 2.04   |
| LOLSGD + $\mathcal{L}_{\text{distill}}$ $\star$      | 0.48    | 0.16       | 0.37 | 4.90   |
| LOLSGD + $\mathcal{L}_{\text{distill}}$ + SE $\star$ | 0.65    | 0.26       | 0.06 | 6.23   |

Table 13: Variances of iWildCam mean accuracy of 21 new locations (cf. Table 6). We compute the variances over 3 random seeds.

| Methods                                              | Overall | Seen       | Seen | Unseen |
|------------------------------------------------------|---------|------------|------|--------|
|                                                      |         | (Chopping) |      |        |
| Source                                               | 0.12    | 1.45       | 5.29 | 0.86   |
| Naive Target                                         | 1.66    | 3.85       | 4.45 | 0.04   |
| SGD $\star$                                          | 0.10    | 1.48       | 1.67 | 0.01   |
| SGD + $\mathcal{L}_{\text{rank}}$ $\star$            | 0.94    | 7.73       | 2.41 | 2.35   |
| SGD + $\mathcal{L}_{\text{distill}}$ $\star$         | 3.76    | 1.26       | 1.32 | 4.07   |
| LOLSGD $\star$                                       | 0.79    | 0.37       | 0.76 | 1.63   |
| LOLSGD + $\mathcal{L}_{\text{rank}}$ $\star$         | 1.70    | 7.85       | 5.03 | 3.98   |
| LOLSGD + $\mathcal{L}_{\text{distill}}$ $\star$      | 1.33    | 0.67       | 1.86 | 3.36   |
| LOLSGD + $\mathcal{L}_{\text{distill}}$ + SE $\star$ | 1.17    | 1.07       | 2.58 | 0.15   |

## 653 D.2 Different Numbers of Images per Seen Class

654 In the real world, it is unrealistic for end-users to collect data for all classes before adaptation. To  
655 further consider a lower data collection cost, we reduce the number of training images per seen class  
656 to study its effects. We conduct the experiment on the Office-Home dataset with “Art” as our source  
657 domain and “Clipart” as our target domain. Specifically, we randomly sample 10% and 50% of the  
658 training images for each seen class and fine-tune the source model for the *same iterations* for fair  
659 comparisons. Interestingly, Table 15 shows that naive fine-tuning can obtain higher unseen accuracy,  
660 compared to naive fine-tuning with more data. The reason might be that training with more data  
661 needs to update the model weights more, making the unseen classes easier to be forgotten. In contrast,  
662 applying our suggested HT methods, especially for LOLSGD with our regularization, the unseen  
663 classes can be better maintained across different training data sizes.

## 664 D.3 Effects of the Source Ensemble Coefficients

665 In section 4, we apply Source Ensemble (with a mixing coefficient  $\alpha = 0.5$ ) to reclaim some ability  
666 of the source model to maintain the unseen accuracy (cf. Table 4). To further understand the trade-off  
667 between the source and the fine-tuned target models, we study the effects of the mixing coefficient  $\alpha$   
668 by varying it between  $[0, 1]$ . We conduct our study on Office-Home and report the overall and unseen  
669 accuracy averaged over all the source-target domain pairs. As shown in Figure 6, applying either SE  
670 or WiSE cannot save the naively fine-tuned target model from being heavily biased to seen classes.  
671 On SGD with frozen classifiers, our SE shows a better trade-off than WiSE [37]. Finally, fine-tuning  
672 target models with our suggested HT methods can clearly yield the best trade-off.

Table 14: Variances of test accuracy for fine-tuning CLIP ViT-B/32 on VTAB (cf. Table 7). 50% of classes in each task are missing during training. We compute the variances over 3 random seeds.

| Overall/Unseen Acc.                 | Catech101 |      | CIFAR100 |      | DTD  |      | EuroSAT |      | Flowers102 |      | Pets |      | Resisc45 |      | SVHN |      | SUN397 |      | Avg. |      |
|-------------------------------------|-----------|------|----------|------|------|------|---------|------|------------|------|------|------|----------|------|------|------|--------|------|------|------|
|                                     | All.      | Uns. | All.     | Uns. | All. | Uns. | All.    | Uns. | All.       | Uns. | All. | Uns. | All.     | Uns. | All. | Uns. | All.   | Uns. | All. | Uns. |
| Source                              | 0.00      | 0.00 | 0.00     | 0.00 | 0.00 | 0.00 | 0.00    | 0.00 | 0.00       | 0.00 | 0.00 | 0.00 | 0.00     | 0.00 | 0.00 | 0.00 | 0.00   | 0.00 | 0.00 | 0.00 |
| Naive Target                        | 0.00      | 0.00 | 0.02     | 0.08 | 0.17 | 1.32 | 0.01    | 0.02 | 0.30       | 0.45 | 0.05 | 0.38 | 0.22     | 1.45 | 0.01 | 0.03 | 0.01   | 0.05 | 0.00 | 0.01 |
| SGD*                                | 0.00      | 0.01 | 0.02     | 0.17 | 0.31 | 0.33 | 0.21    | 0.59 | 0.16       | 0.07 | 0.03 | 0.15 | 0.13     | 1.00 | 0.03 | 0.02 | 0.00   | 0.01 | 0.02 | 0.02 |
| LOLSGD*                             | 0.01      | 0.00 | 0.01     | 0.03 | 0.39 | 1.33 | 0.16    | 0.69 | 0.21       | 0.12 | 0.03 | 0.13 | 0.01     | 0.07 | 2.29 | 0.14 | 0.06   | 0.29 | 0.04 | 0.01 |
| LOLSGD + $\mathcal{L}_{distill}$ *  | 0.00      | 0.00 | 0.01     | 0.04 | 0.04 | 0.00 | 0.13    | 0.20 | 0.01       | 0.02 | 0.01 | 0.00 | 0.01     | 0.02 | 1.80 | 0.01 | 0.00   | 0.00 | 0.01 | 0.00 |
| LOLSGD + $\mathcal{L}_{rank}$ *     | 0.00      | 0.01 | 0.00     | 0.02 | 0.07 | 0.07 | 0.17    | 0.34 | 0.06       | 0.02 | 0.02 | 0.01 | 0.01     | 0.10 | 1.37 | 0.36 | 0.03   | 0.06 | 0.01 | 0.00 |
| LOLSGD + $\mathcal{L}_{rank}$ + SE* | 0.01      | 0.02 | 0.07     | 0.14 | 0.12 | 0.33 | 0.06    | 0.05 | 0.06       | 0.03 | 0.00 | 0.03 | 0.05     | 0.09 | 1.91 | 0.82 | 0.01   | 0.05 | 0.00 | 0.02 |
| Oracle                              | 0.29      | 0.19 | 0.00     | 0.01 | 0.40 | 0.50 | 0.01    | 0.07 | 0.27       | 0.35 | 0.02 | 0.14 | 0.02     | 0.12 | 0.00 | 0.00 | 0.00   | 0.01 | 0.02 | 0.03 |

Table 15: Different percentages of the target training data for each seen class on Office-Home: Ar  $\rightarrow$  Cl.

| % of target training<br>Methods/Acc.                      | 10%          |              | 50%          |              | 100%         |              |
|-----------------------------------------------------------|--------------|--------------|--------------|--------------|--------------|--------------|
|                                                           | Overall      | Unseen       | Overall      | Unseen       | Overall      | Unseen       |
| Source                                                    | 47.07        | 50.29        | 47.07        | 50.29        | 47.07        | 50.29        |
| Naive Target                                              | 41.73        | 19.74        | 43.46        | 9.94         | 44.96        | 9.06         |
| SGD*                                                      | 51.28        | 41.96        | 52.33        | 28.36        | 52.11        | 24.12        |
| SGD + $\mathcal{L}_{rank}$ *                              | 50.45        | 46.49        | 56.02        | 40.20        | 59.17        | 39.47        |
| SGD + $\mathcal{L}_{distill}$ *                           | 48.80        | 41.37        | 53.91        | 38.30        | 56.54        | 39.18        |
| LOLSGD*                                                   | <b>52.63</b> | 46.20        | 54.21        | 34.94        | 56.47        | 35.09        |
| LOLSGD + $\mathcal{L}_{rank}$ *                           | 51.13        | 48.83        | 55.86        | 44.74        | 58.57        | 43.86        |
| LOLSGD + $\mathcal{L}_{distill}$ *                        | 51.28        | 45.91        | 55.19        | 44.88        | 57.44        | 46.35        |
| LOLSGD + $\mathcal{L}_{distill}$ + $\mathcal{L}_{rank}$ * | 51.05        | <b>50.88</b> | <b>58.65</b> | <b>52.05</b> | <b>60.83</b> | <b>51.75</b> |

## 673 E Additional Discussions

### 674 E.1 Limitations

675 In this paper, we introduce a novel and practical transfer learning problem, holistic transfer, that  
 676 emphasizes the generalization to domain shifts for classes unseen in the target domain but seen in  
 677 the source domain. We establish strong baselines and demonstrate the potential for simultaneously  
 678 improving both seen and unseen target classes. One potential limitation is that we mainly focus on  
 679 vision classification tasks. We leave the studies to image segmentation/object detection and natural  
 680 language processing tasks as our future work. We also plan to explore better approaches for the  
 681 disentanglement of domain styles and classes and to integrate our approach with other learning  
 682 paradigms, like test-time adaptation.

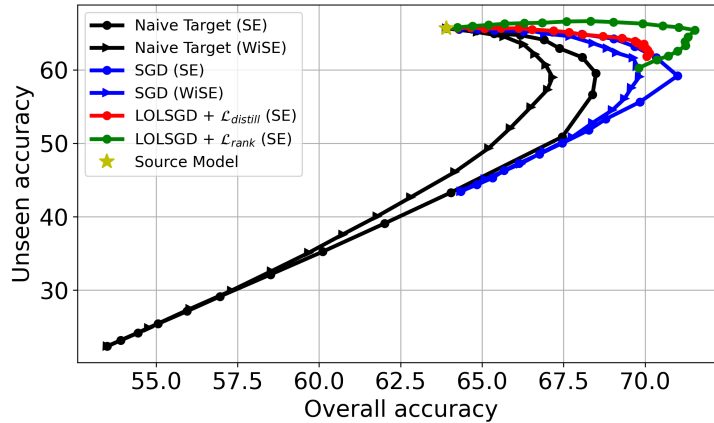

Figure 6: Effects of Source Ensembles. Ensemble of the source (the star marker) and the target models (the end point of each line from the source model) with a mixing coefficient  $\alpha \in [0, 1]$  on Office-Home.

683 **E.2 Potential Negative Societal Impact**

684 The goal of our work is to introduce and study a practical transfer learning problem, holistic transfer.  
685 We provide strong baselines and analyze the problem on publicly available datasets, which are  
686 adjusted and split to meet our problem setting. As far as we know, our work does not introduce  
687 additional negative societal impacts compared to the standard transfer learning topics, like domain  
688 adaptation and out-of-distribution generalization.

689 **E.3 Computation Resources**

690 We conduct our experiments on PyTorch and on NVIDIA V100 GPUs. On the Office-Home dataset,  
691 fine-tuning for 1 target domain with all the compared methods and random seeds takes roughly 36  
692 hours on 1 GPU. Similar time consumption also applies to iWildCam and VTAB datasets. On the  
693 smaller FEMNIST dataset, it takes roughly 0.5 hours on 1 GPU to get the required results for 1  
694 target domain. The whole experiment on iNaturalist Fungi takes roughly 0.5 on 1 GPU. In total, our  
695 experiments take roughly 1.3K GPU hours.
